# Supplementary material for: Adjuvants influence the maturation of VRC01-like antibodies during immunization
Source: PubMed Central journal article supplement — iScience. 2022 Nov 2;25(11):105473. doi: 10.1016/j.isci.2022.105473 (PMC9667313; doi:10.1016/j.isci.2022.105473), 2022-11-02
Supplement: mmc1.pdf [file mmc1.pdf]

**Supplemental information**

**Adjuvants influence the maturation of VRC01-like  
antibodies during immunization**

**Maria L. Knudsen, Parul Agrawal, Anna MacCamy, K. Rachael Parks, Matthew D. Gray, Brittany N. Takushi, Arineh Khechaduri, Kelsey R. Salladay, Rhea N. Coler, Celia C. LaBranche, David Montefiori, and Leonidas Stamatatos**

Figure S1, Plasma antibody responses elicited by HXB2.WT.Core, Related to Figure 2

A.

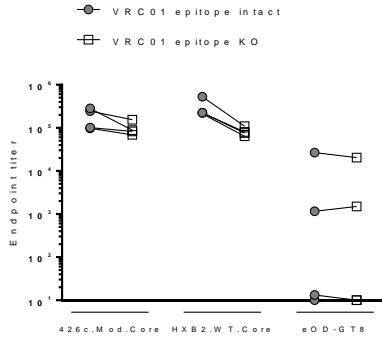

B.

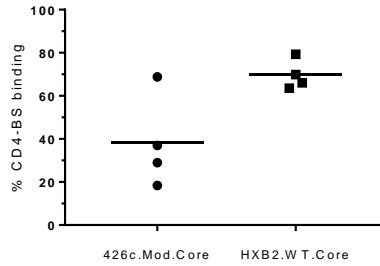

Figure S1. Plasma antibody responses elicited by HXB2.WT.Core. Related to Figure 2. (A) Mice were immunized with HXB2.WT.Core Ferritin adjuvanted with GLA-LSQ, and the plasma antibody responses were evaluated 2 weeks later against the indicated Env proteins (closed symbols) and their corresponding CD4-BS KO versions (open symbols). Each symbol represents one mouse, and lines connect data from the same mouse. (B) Percentages of plasma antibodies binding to the CD4-BS of the indicated proteins (derived from the results in panel (A)). Horizontal lines represent mean values of the indicated groups.

Figure S2, Information on the VRC01-like mAbs isolated following the boost immunization with HxB2.WT.Core, Related to Figure 5 and Table 1

| mAb code | HC, #aa changes | LC, #aa changes | HC V-gene           | HC J-gene         | LC V-gene            | LC J-gene         | Adjuvant  |
|----------|-----------------|-----------------|---------------------|-------------------|----------------------|-------------------|-----------|
| MLK-002  | 15              | 8               | Homsap IGHV1-2*02 F | Homsap IGHJ1*01 F | Musmus IGKV8-30*01 F | Musmus IGKJ1*01 F | Poly(I:C) |
| MLK-004  | 9               | 2               | Homsap IGHV1-2*02 F | Homsap IGHJ1*01 F | Musmus IGKV8-30*01 F | Musmus IGKJ1*01 F |           |
| MLK-005  | 7               | 3               | Homsap IGHV1-2*02 F | Homsap IGHJ1*01 F | Musmus IGKV8-30*01 F | Musmus IGKJ1*01 F |           |
| MLK-006  | 5               | 4               | Homsap IGHV1-2*02 F | Homsap IGHJ1*01 F | Musmus IGKV8-30*01 F | Musmus IGKJ1*01 F |           |
| MLK-008  | 8               | 4               | Homsap IGHV1-2*02 F | Homsap IGHJ1*01 F | Musmus IGKV8-30*01 F | Musmus IGKJ2*01 F | GLA-LSQ   |
| MLK-009  | 11              | 5               | Homsap IGHV1-2*02 F | Homsap IGHJ1*01 F | Musmus IGKV8-30*01 F | Musmus IGKJ2*01 F |           |
| MLK-010  | 8               | 6               | Homsap IGHV1-2*02 F | Homsap IGHJ1*01 F | Musmus IGKV8-30*01 F | Musmus IGKJ2*01 F |           |
| MLK-012  | 0               | 0               | Homsap IGHV1-2*02 F | Homsap IGHJ1*01 F | Musmus IGKV8-30*01 F | Musmus IGKJ2*01 F |           |
| MLK-014  | 7               | 2               | Homsap IGHV1-2*02 F | Homsap IGHJ1*01 F | Musmus IGKV8-30*01 F | Musmus IGKJ2*01 F |           |
| MLK-015  | 9               | 3               | Homsap IGHV1-2*02 F | Homsap IGHJ1*01 F | Musmus IGKV8-30*01 F | Musmus IGKJ2*01 F |           |
| MLK-016  | 7               | 4               | Homsap IGHV1-2*02 F | Homsap IGHJ1*01 F | Musmus IGKV8-30*01 F | Musmus IGKJ2*01 F |           |

Figure S2. Information on the VRC01-like mAbs isolated following the boost immunization with HxB2.WT.Core. Related to Figure 5 and Table 1. Eleven VRC01-like mAbs were generated from animals in the Poly(I:C) and GLA-LSQ groups following their immunization with the HxB2.WT.Core Ferritin. The Env-recognition properties of these mAbs is presented in Figure 5. Their neutralizing potentials are presented in Table 1B.

Figure S3, mVRC01 and gIVRC01 mAbs binding curves, Related to Figure 5 and Table 1

A.

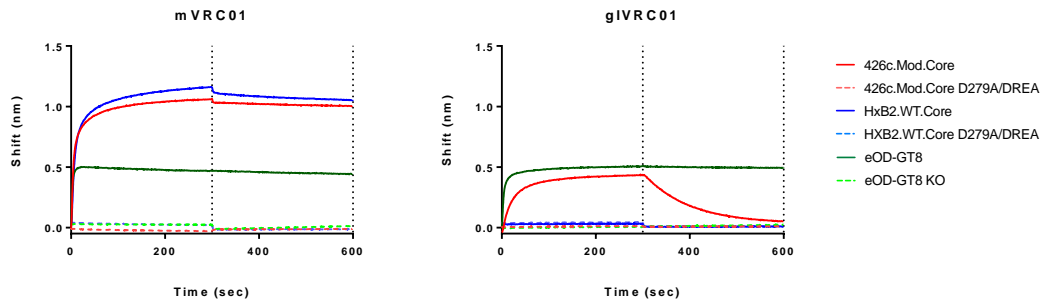

B.

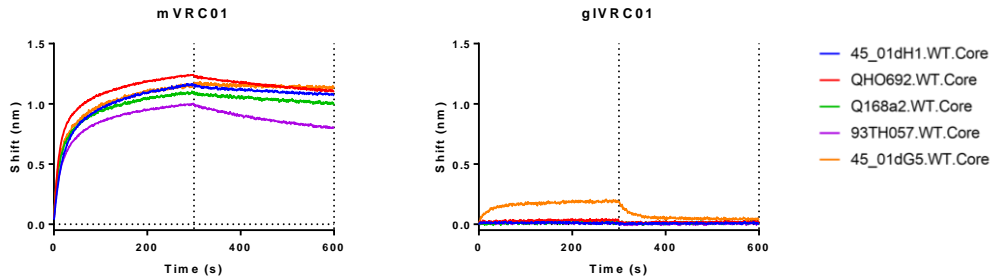

Figure S3. Related to Figure 5 and Table 1. mVRC01 and gIVRC01 mAbs binding curves. Binding properties of mVRC01 and gIVRC01 to the indicated soluble monomeric Envs (A) and five heterologous WT Cores (B) are shown as controls. Dotted lines indicate end of association and dissociation phases.

Table S1, All primers and cycling conditions used to amplify heavy and light chain, Related to Figure 3

| PCR Step         | Annealing temp.                 | Primer name      | 5'-3' sequence                | Reference                        |
|------------------|---------------------------------|------------------|-------------------------------|----------------------------------|
| Igκ<br>1st       | 50°C                            | <b>Forward</b>   |                               | Tiller et al. J Immunol Met 2009 |
|                  |                                 | 5' L-Vk_3        | TGCTGCTGCTCTGGGTCCAG          |                                  |
|                  |                                 | 5' L-Vk_4        | ATTWTCAGCTTCTGCTAATC          |                                  |
|                  |                                 | 5' L-Vk_5        | TTTTGCTTTTCTGGATTYCAC         |                                  |
|                  |                                 | 5' L-Vk_6        | TCGTGTTKCTSTGTTGTCTG          |                                  |
|                  |                                 | 5' L-Vk_6,8,9    | ATGGAATCACAGRCYCWGGT          |                                  |
|                  |                                 | 5' L-Vk_14       | TCTTGTGCTCTGTTYCCAG           |                                  |
|                  |                                 | 5' L-Vk_19       | CAGTTCCTGGGGCTCTTGTGTTTC      |                                  |
|                  |                                 | 5' L-Vk_20       | CTCACTAGCTCTTCCTC             |                                  |
|                  |                                 | <b>Reverse</b>   |                               |                                  |
| 3' mCx           | GATGGTGGGAAGATGGATACAGTT        |                  |                               |                                  |
| Igκ<br>2nd       | 45°C                            | <b>Forward</b>   |                               |                                  |
|                  |                                 | 5' mVκappa *     | GAYATTGTGMTSACMCARWCTMCA      |                                  |
|                  |                                 | <b>Reverse</b>   |                               |                                  |
|                  |                                 | 3' BsiWI P-mJK01 | GCCACCGTACGTTTGATTCCAGCTTGGTG |                                  |
|                  |                                 | 3' BsiWI P-mJK02 | GCCACCGTACGTTTATTCCAGCTTGGTC  |                                  |
|                  |                                 | 3' BsiWI P-mJK03 | GCCACCGTACGTTTATTCCAACITTTGTC |                                  |
| 3' BsiWI P-mJK04 | GCCACCGTACGTTTCCAGCTCCAGCTTGGTC |                  |                               |                                  |
| IgH<br>1st       | 56°C                            | <b>Forward</b>   |                               |                                  |
|                  |                                 | 5' Mouse Leader  | CTCTTCTCCTGTCAGTAACTGAAGGTGTC |                                  |
|                  |                                 | <b>Reverse</b>   |                               |                                  |
|                  |                                 | 3' KI Rev        | TGAGGAGACGGTGACCAGGGTGCC      |                                  |
| IgH<br>2nd       | 60°C                            | <b>Forward</b>   |                               | Jardine et al. Science 2015      |
|                  |                                 | 5' gIVRC01 *     | CAGGTGCAGCTGGTGCAGTCTGG       |                                  |
|                  |                                 | <b>Reverse</b>   |                               |                                  |
|                  |                                 | 3' KI Rev        | TGAGGAGACGGTGACCAGGGTGCC      | -                                |

Table S3, VH/VL sequences of the VRC01-like antibodies isolated after the boost immunization. Amino acid sequences are aligned to the V gene from which they are derived. For sequences where the PCR product did not contain the 5' end, the sequence is shown beginning at CDR1, Related to Figure 5

| VRC01g1HC   |                                                                                                             |
|-------------|-------------------------------------------------------------------------------------------------------------|
| Ab name     | QVQLVQSGAEVKKPGASVKVSKASGYTFTGYYMHWRQAPGGLEWMGWINPNSGGTNYAQKFGGRVTMTRDTSISTAYMELSRRLSDDTAVYYCARGKNSDYNWDFQH |
| MLK-002     | -----D..IN.....RH.....R.....NIVF.....T...A.I.F....D.....                                                    |
| MLK-004     | -----D..IN...T.....KN.....T.....D..F.....                                                                   |
| MLK-005     | -----D..IN.....KH.....I.....D.....                                                                          |
| MLK-006     | -----A.....D..N.....R.....I..K.....                                                                         |
| MLK-008     | -----VN.....TN.....Q.....A...V.....D.....                                                                   |
| MLK-009     | -----D.FIN.....L.....R.A.....S.G...S.....D.....                                                             |
| MLK-010     | -----E.....VN.....TN.....Q.....A...L.....D.....                                                             |
| MLK-012     | -----                                                                                                       |
| MLK-014     | -----D..VN.....TN.....Q.....A.....                                                                          |
| MLK-015     | -----T...D..N.M.....L...YR.A.....G...S.....                                                                 |
| MLK-016     | -----VN.....TN.....Q.....A...V.....                                                                         |
| IGKV8-30*01 |                                                                                                             |
| Ab name     | DIVMSQSPSSLAVSGEKVTMSCKSSQSLLYSSNQKNYLAWYQQKPGQSPKLLIYWASTRESGVPDRFTGSGSGTDFTLTITSSVKAEDLAVYYCQQYYSS        |
| MLK-002     | -----...HD...T.D.D.....A.....D.....H..Q                                                                     |
| MLK-004     | -----D.....S.....K                                                                                          |
| MLK-005     | -----D...D.D.....K                                                                                          |
| MLK-006     | -----I...D.E.S.....K                                                                                        |
| MLK-008     | -----D.N.....S.....S.....EA                                                                                 |
| MLK-009     | -----D.E.....P.....F.....I.....EF                                                                           |
| MLK-010     | -----N..N.D.N.....S.....S.....EA                                                                            |
| MLK-012     | -----EA                                                                                                     |
| MLK-014     | -----D.N.....EA                                                                                             |
| MLK-015     | -----E.....Y.....I.....E.                                                                                   |
| MLK-016     | -----D.N.....S.....S.....EA                                                                                 |
